# Supplementary material for: Chemotherapeutic Activity of Pitavastatin in Vincristine Resistant B-Cell Acute Lymphoblastic Leukemia
Source: MDPI journal article supplement (doi:10.3390/cancers15030707), 2023-01-24
Supplement: s1 [file s1]

# **Chemotherapeutic Activity of Pitavastatin in Vincristine Resistant B-Cell Acute Lymphoblastic Leukemia**

**Debbie Piktel <sup>1,2</sup>, Javohn C. Moore <sup>1</sup>, Sloan Nesbit <sup>1</sup>, Samuel A. Sprowls <sup>3,4,5</sup>, Michael D. Craig <sup>1,6</sup>,  
Stephanie L. Rellick <sup>1,2</sup>, Rajesh R. Nair <sup>1</sup>, Ethan Meadows <sup>7,8</sup>, John M. Hollander <sup>7,8</sup>,  
Werner J. Geldenhuys <sup>3,8,9</sup>, Karen H. Martin <sup>1,2</sup> and Laura F. Gibson <sup>1,2,\*</sup>**

<sup>1</sup> West Virginia University Cancer Institute, Robert C. Byrd Health Sciences Center, West Virginia University, Morgantown, WV 26506, USA

<sup>2</sup> Department of Microbiology, Immunology and Cell Biology, West Virginia University School of Medicine, Morgantown, WV 26506, USA

<sup>3</sup> Department of Pharmaceutical Sciences, West Virginia University School of Pharmacy, Morgantown, WV 26506, USA

<sup>4</sup> Departments of Cardiovascular and Metabolic Sciences, Lerner Research Institute, Cleveland Clinic, Cleveland, OH 44195, USA

<sup>5</sup> Case Comprehensive Cancer Center, Cleveland, OH 44195, USA

<sup>6</sup> Queen's Health System, Honolulu, HI 96813, USA

<sup>7</sup> Department of Physiology and Pharmacology, School of Medicine, West Virginia University, Morgantown, WV 26506, USA

<sup>8</sup> Mitochondria, Metabolism & Bioenergetics Working Group, West Virginia University, Morgantown, WV 26506, USA

<sup>9</sup> Department of Neuroscience, School of Medicine, West Virginia University, Morgantown, WV 26506, USA

\* Correspondence: lgibson@hsc.wvu.edu; Tel.: +1-(304)-293-7206

## Supplemental figures

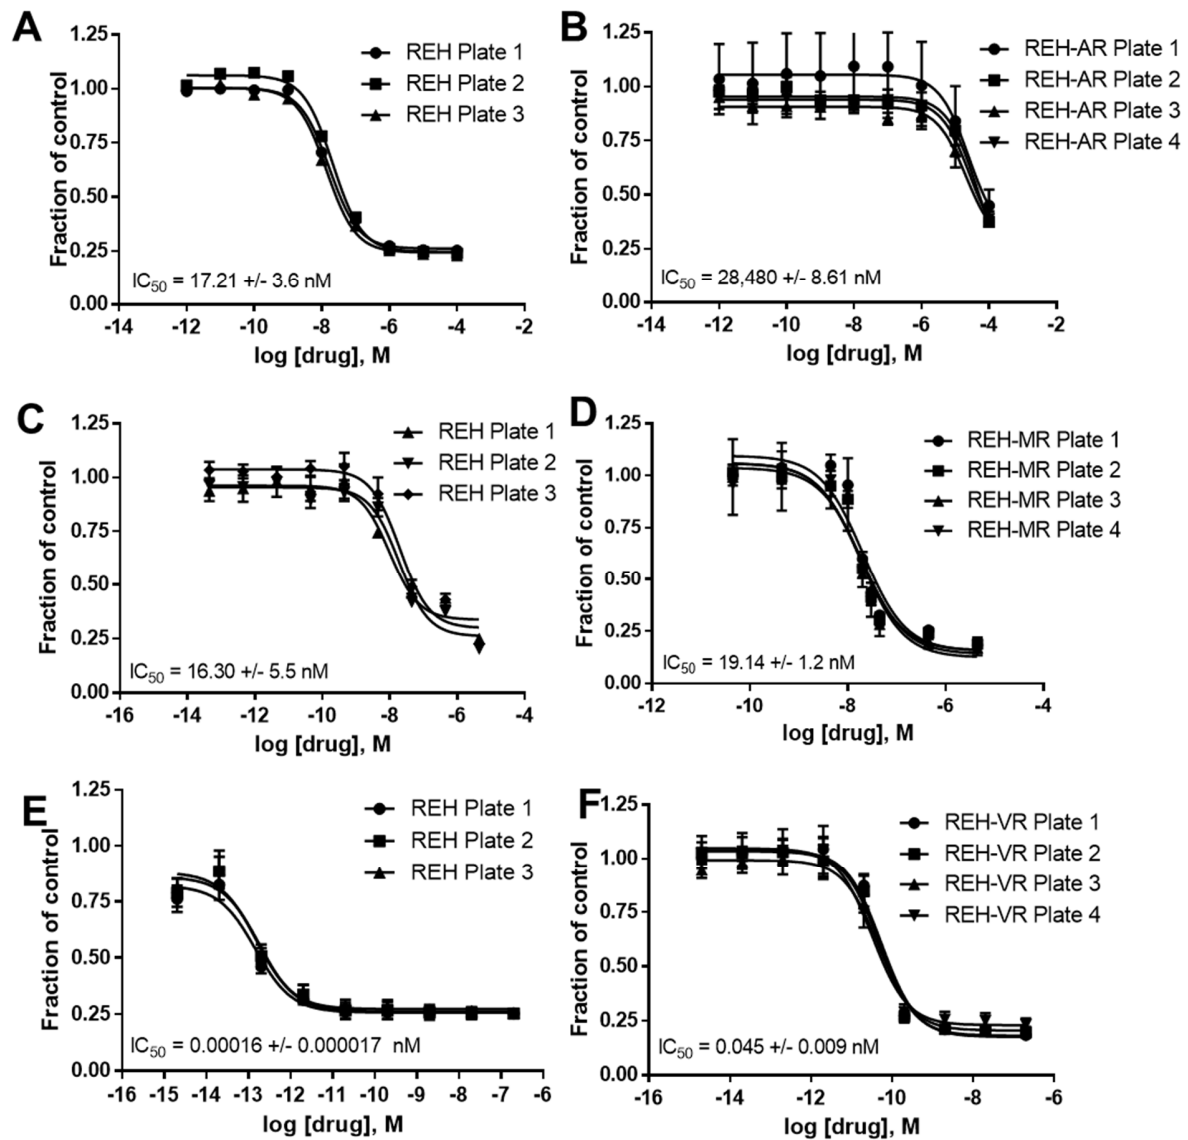

**Figure S1.** Dose-response effect of chemotherapeutics on cell proliferation, using CCK-8 (WST-8) reagent. Ara-C treatment in (A) REH and (B) REH-AR resistant cells; MTX treatment in (C) REH and (D) REH-MR resistant cells; and vincristine treatment in (E) REH and (F) REH-VR resistant cells. The  $IC_{50}$  for only Ara-C and vincristine was significantly different ( $p < 0.05$ ; Student-t test), but not for MTX. Each data point is  $avg \pm S.D.$ , with  $N = 4$ . To show reproducibility of the assay, we repeated the experiments 3-4 times.

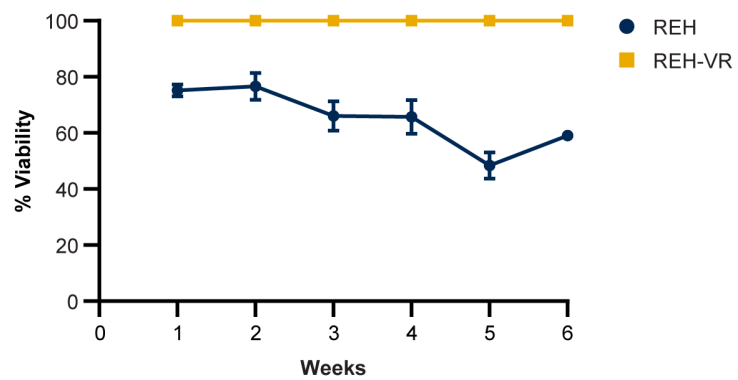

**Figure S2.** Stability of vincristine resistance. The vincristine resistance remained stable throughout the experimental design. Vincristine treatment was 2 nM. Percent viability determined using Trypan Blue exclusion method. N = 4. Data represents average  $\pm$  S.D.

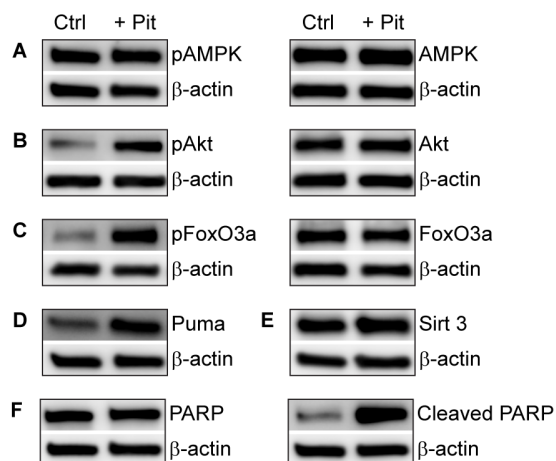

**Figure S3.** Pitavastatin effects on metabolic regulators. REH cells were treated with 450 nM pitavastatin (+ Pit) or DMSO vehicle control (Ctrl). Western blot analysis shows changes in phosphorylated and total protein levels following 48 hours treatment. We observed an increase in phospho-AKT, PARP cleavage, phospho-FoxO3a (Ser413), and Puma with pitavastatin treatment.

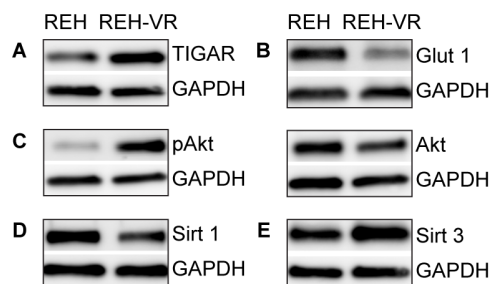

**Figure S4.** Differential expression of proteins in the vincristine-resistant cells. Western blot analysis of proteins in REH and REH-VR cells.

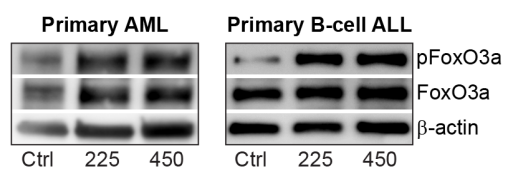

**Figure S5. Pitavastatin treatment of primary leukemia samples.** Primary human samples from AML and B-cell ALL patients were treated with pitavastatin at 225 nM and 450 nM and the protein expression levels of phospho-FoxO3a determined by Western Blot analysis. Control treatment (Ctrl) was DMSO vehicle.
