# Supplementary material for: Chemotherapeutic Activity of Pitavastatin in Vincristine Resistant B-Cell Acute Lymphoblastic Leukemia
Source: MDPI journal article supplement (doi:10.3390/cancers15030707), 2023-01-24
Supplement: s1 [file s1]

PMMP  
Fig 4 (B)

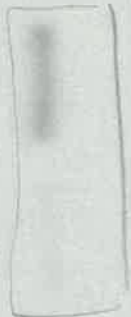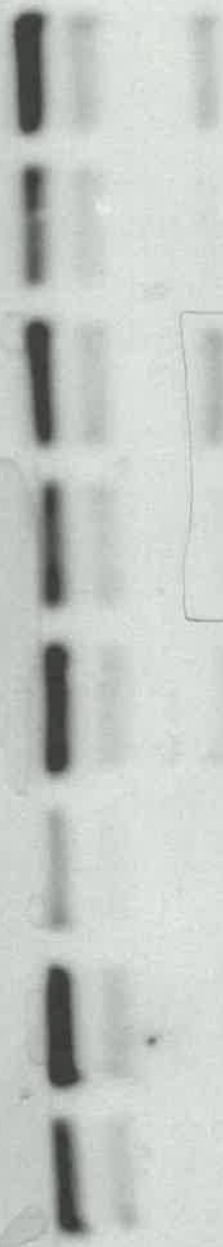

Cleared  
RABP  
Fig 1 (B)

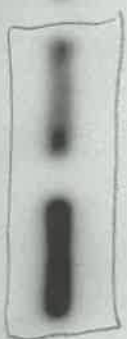

Boethia  
(Parr)  
C-Parr  
Fig 4 (B)

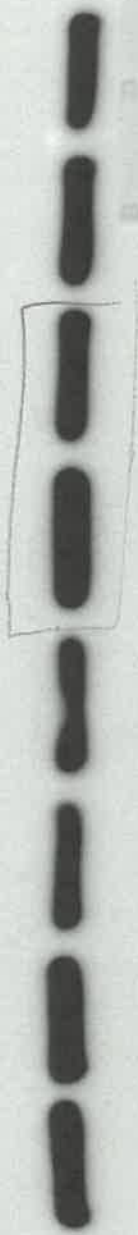

PA

PAMPk  
Fig 5 (A)

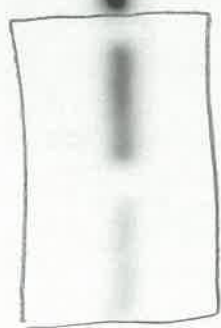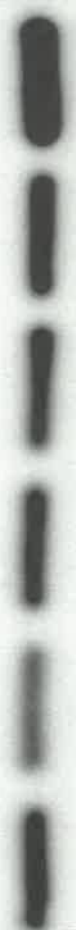

Bact<sup>n</sup>  
(pAMPk)  
Fig 5(A)

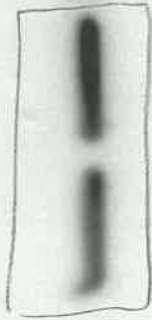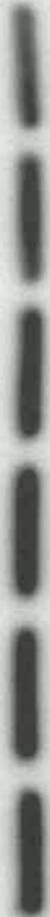

pAMP

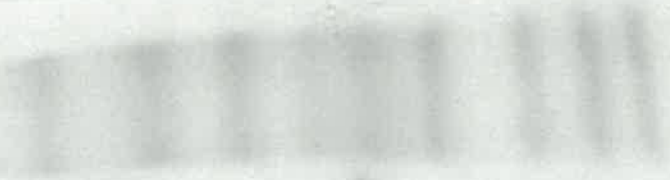

AMPK  
Fig 5 (A)

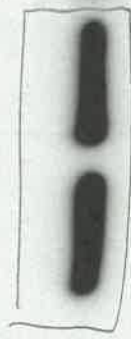

Bact<sup>n</sup>  
(Amp<sup>r</sup>)  
Fig 5 (A)

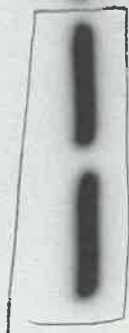

PAkt  
Fig 5(B)

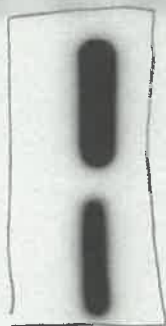



PAK

bach<sup>+</sup>  
(PAK<sup>+</sup>)  
Fig 5 (B)

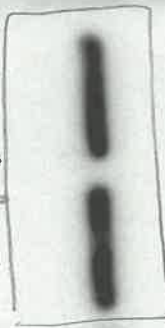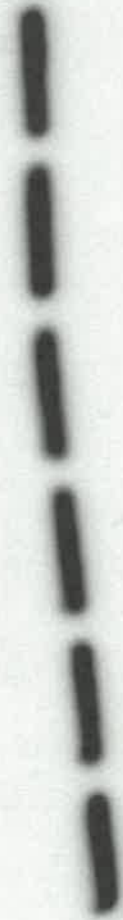

Akt  
Fig 5(B)

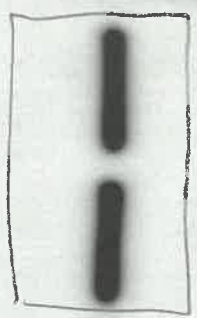

AKT

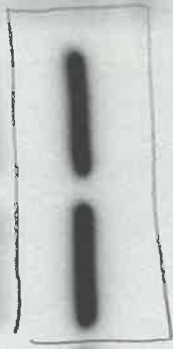

Bactin  
(Akt)  
Fig 5(B)

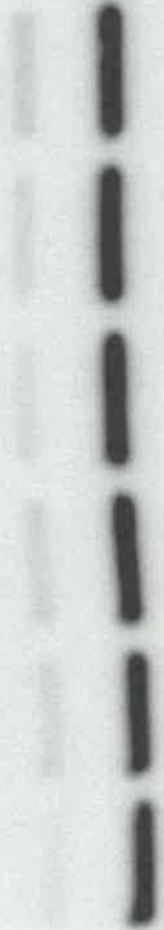

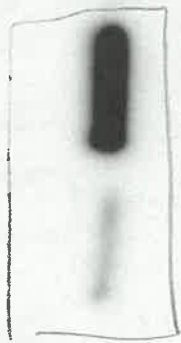

proXO3a  
Fig 5 (c)

pFox

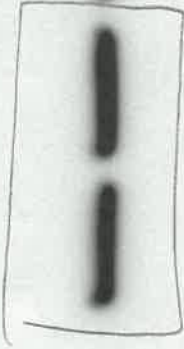

Bact m  
(pFox03a)  
Fig 5(c)

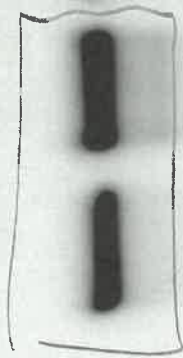

FoxO3a

Fig 5(c)

FOX

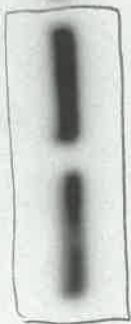

$\beta$ actin  
(FOX03a)  
Fig 5 (c)

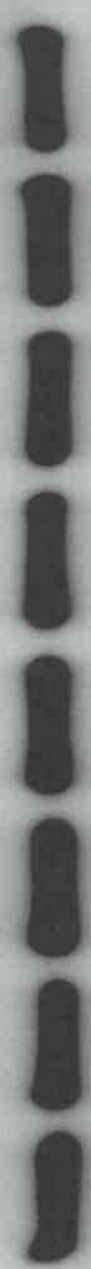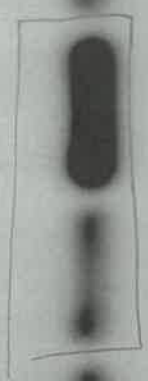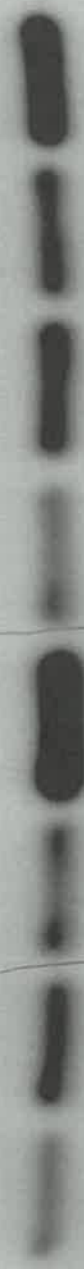

Puma  
Fig 5(D)



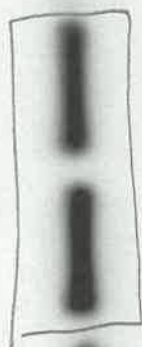

Bactn  
(P<sub>ind</sub>)  
Fig 5(D)

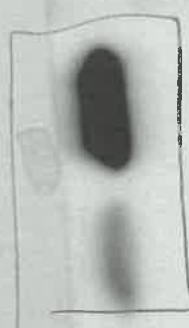

Virt 3  
Fig 5 (E)

Bact<sup>n</sup>  
Birt 3)  
Fig 5(E)

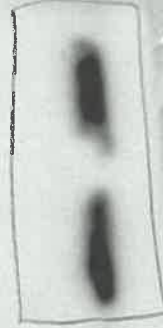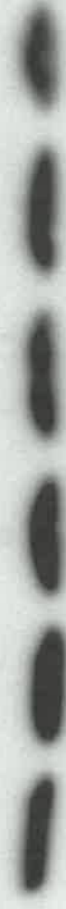

PAMPK

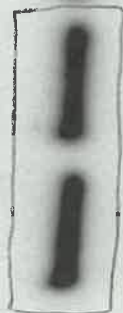

PAMPK  
Fig S2 (A)

Bach<sup>1</sup>  
pAMPK

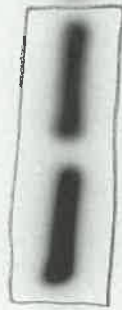

Bach<sup>1</sup>  
(pAMPK)  
Fig S2(A)

4

iduna AMPK

Fig S2(A)

AMPK

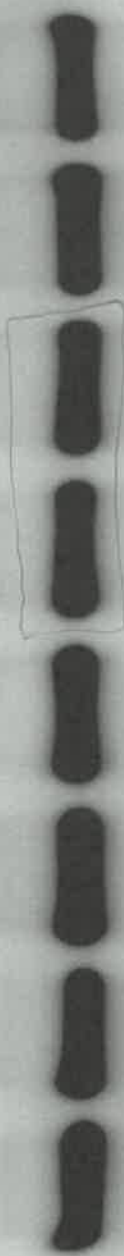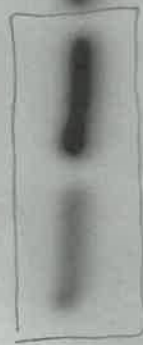

Puma

Fig S2(D)

$\beta$ actin  
Puma AmpK

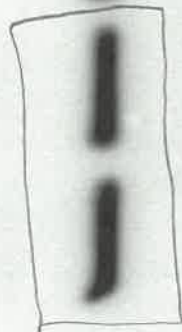

$\beta$ actin  
(Puma)

Fig S2(D)

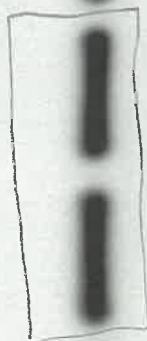

$\beta$ actin  
(AmpK)

Fig S2(A)

PA<sub>1</sub>+

Fig S2 (B)

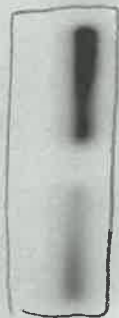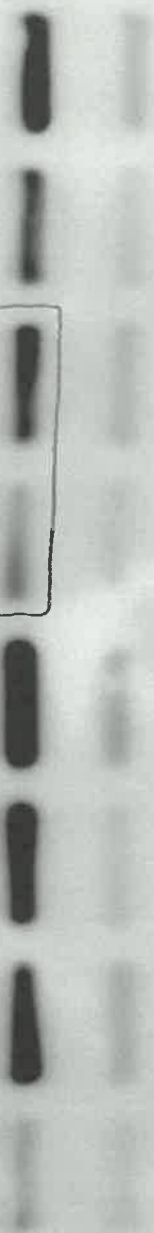

PA1CTAP



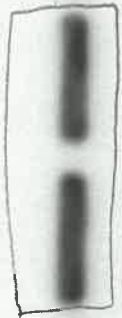

Bact<sup>n</sup>  
(PAkt)  
Fig S2(B)

Bact<sup>n</sup>  
PAkt

Alk+ DAP

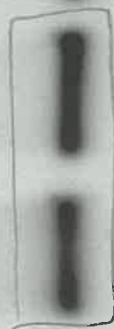

Alk+  
Fig S2 (B)

Bactn  
TAPPAkt

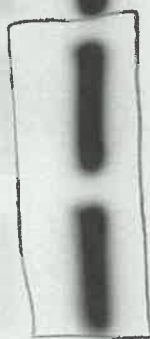

Bactn  
(Akt)  
Fig S2(B)

PFOXD3a

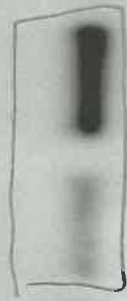

PFOXD3a

Fig S2 (c)

Bactn  
PFOX03a

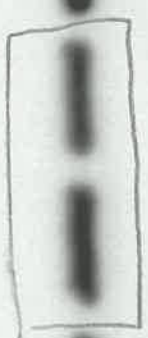

Bactn  
(PFOX03a)  
Fig S2(c)

FoxO3a

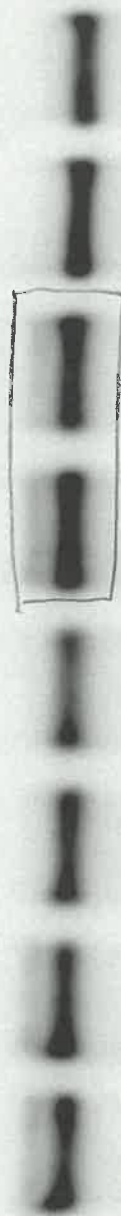

FoxO3a  
Fig S2 (c)

Bact<sub>1</sub>  
FoxO3a

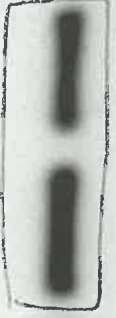

Bact<sub>1</sub>  
(FoxO3a)  
Fig S2(c)

5

5

Sort 3

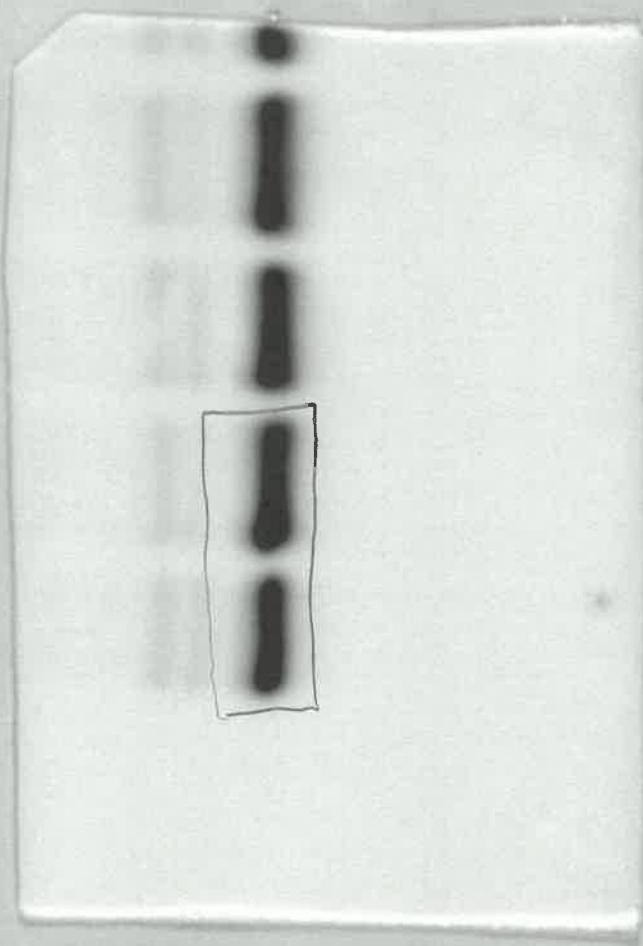

Fig S2 (E)



Bachn 5143

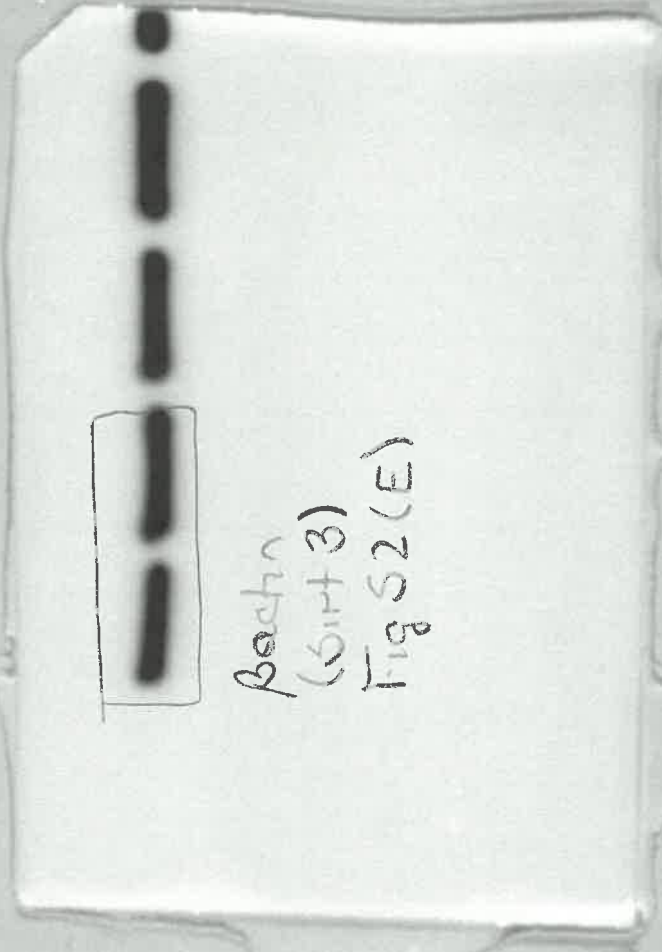

Bachn  
(5143)  
Fig 52(E)

DarP

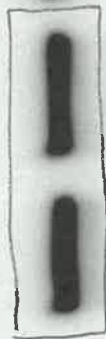

DarP  
Fig S2(F)

*Bactn Darp*

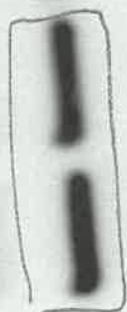

*Bactn  
(Darp)  
Fig 52(F)*

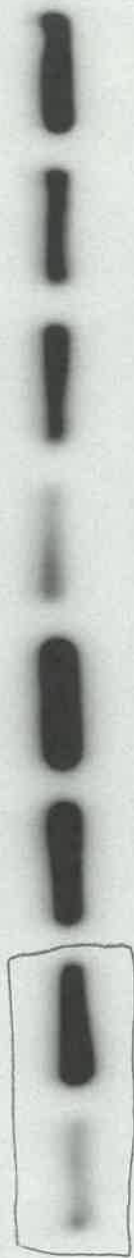

CDarp  
Fig S2(F)

CDarp

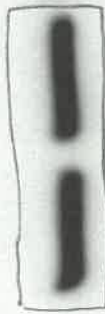

$\beta$ actin  
(CDARP)  
Fig S2 (F)

$\beta$ actin CDARP

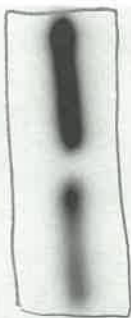

TIGAR  
Fig S3 (A)

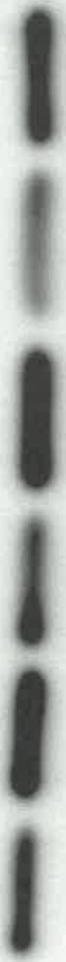

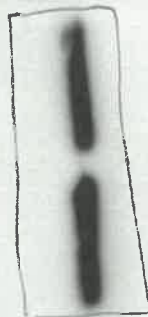

Gapdh  
(Tigar)  
Fig S3 (A)

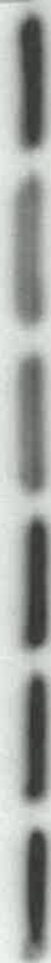



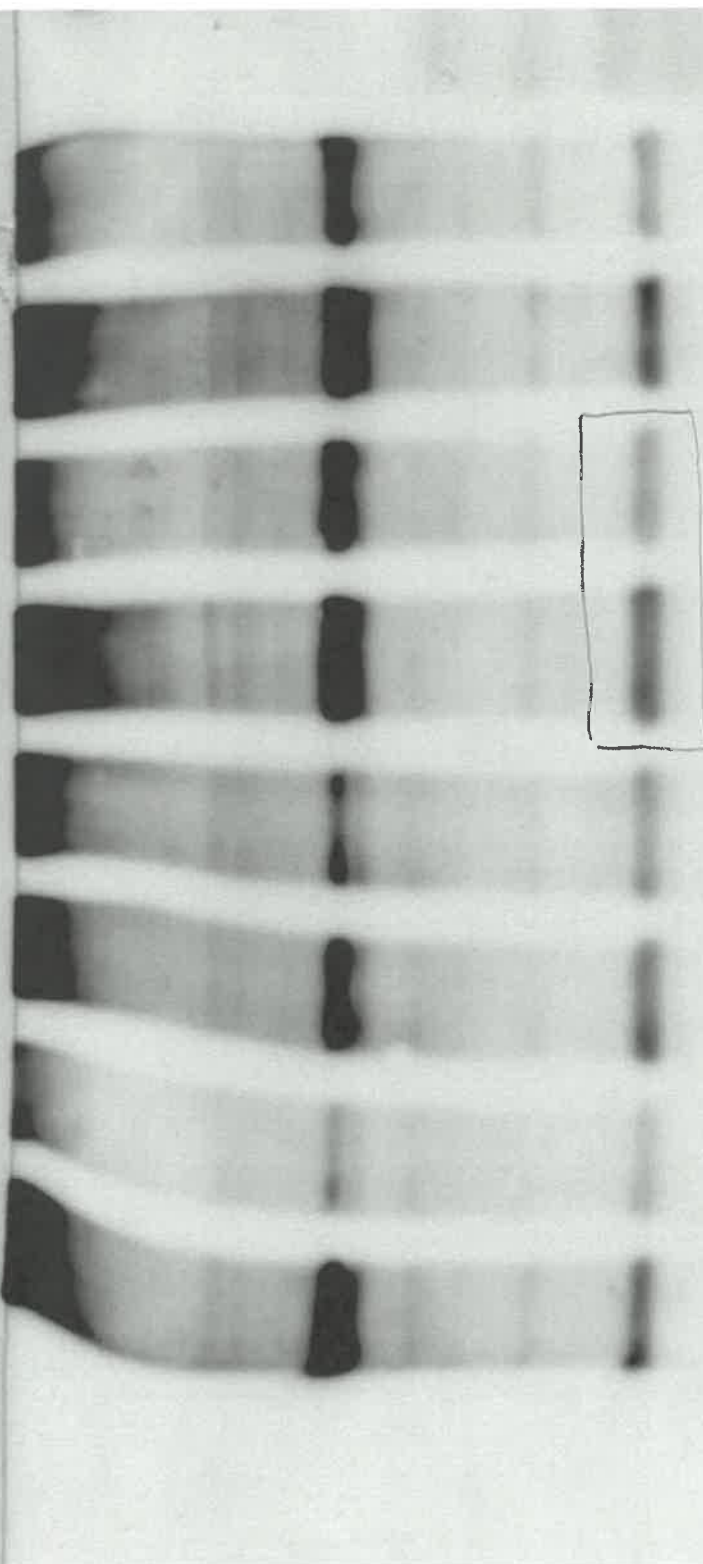

Glut 1  
Fig 53 (B)



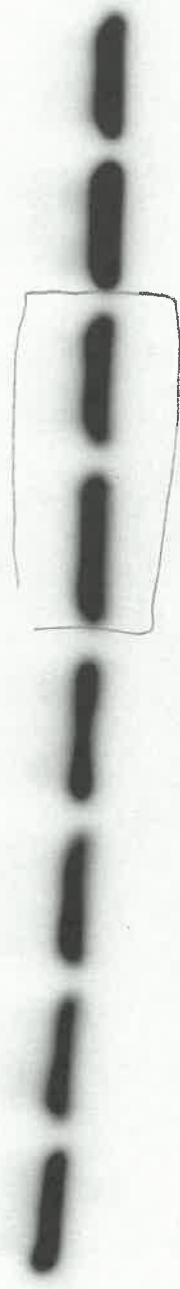

Gapdh  
(Clut 1)  
Fig 53(B)

PAK

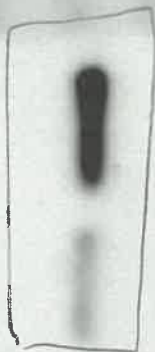

PAK+

Fig 53(c)

pAkt

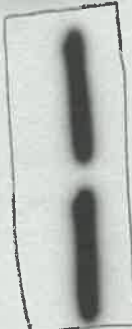

Gapdh  
(pAkt)  
Fig S3(c)

Akt

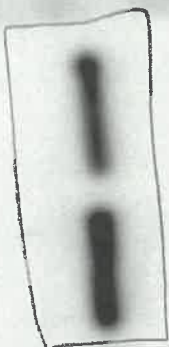

Akt+  
Fig S3 (c)

Ak

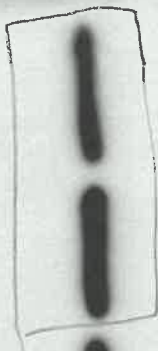

Gapdh  
(Akt+)  
Fig S3 (c)

Y<sub>12</sub>+1  
Fig 53(D)

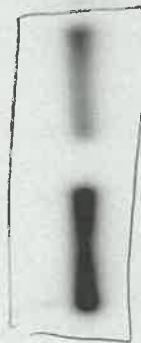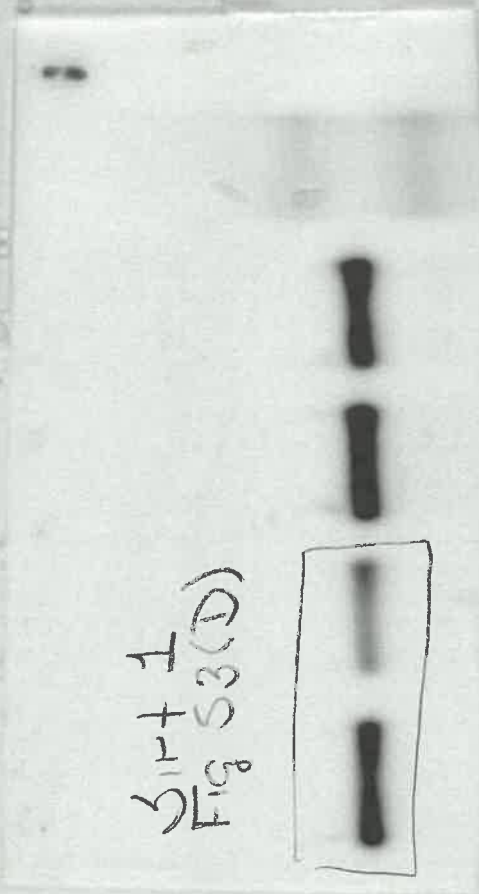

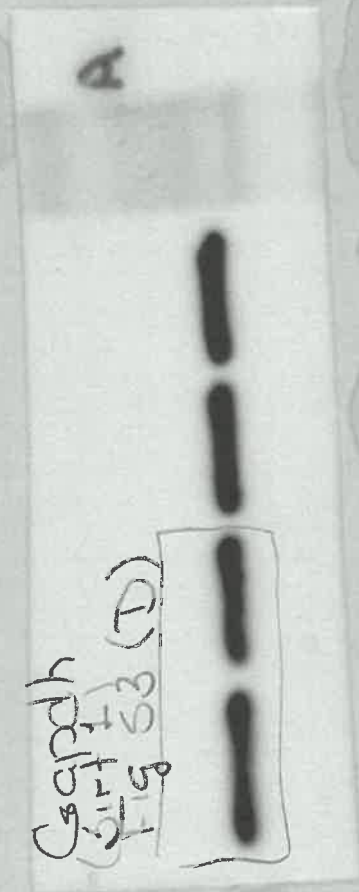



3

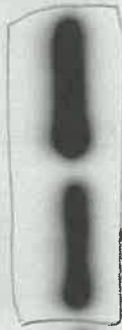

Δirt 3  
Fig 53(E)



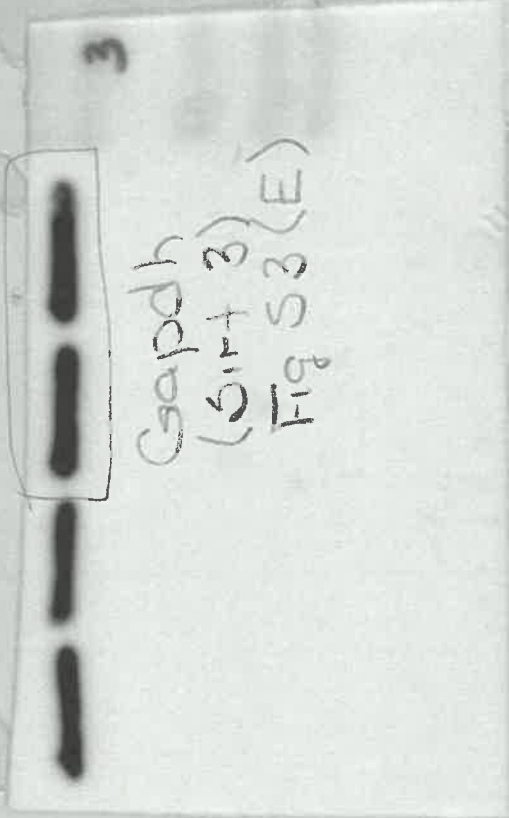

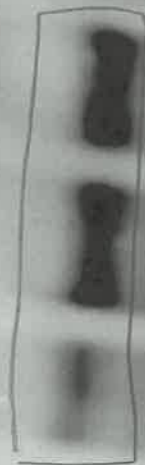

PF0X03a

Fig 54

Primary  
Anti

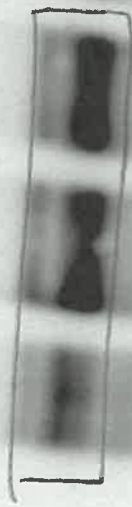

FoxO3a  
Fig 54  
Primary  
AML

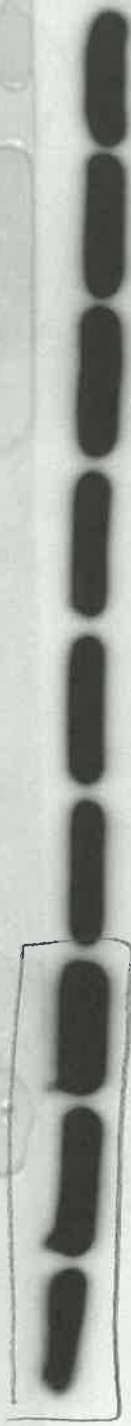

Bactin  
(pFOX03a +  
FOX03a)  
Fig 54  
Primary  
Amk

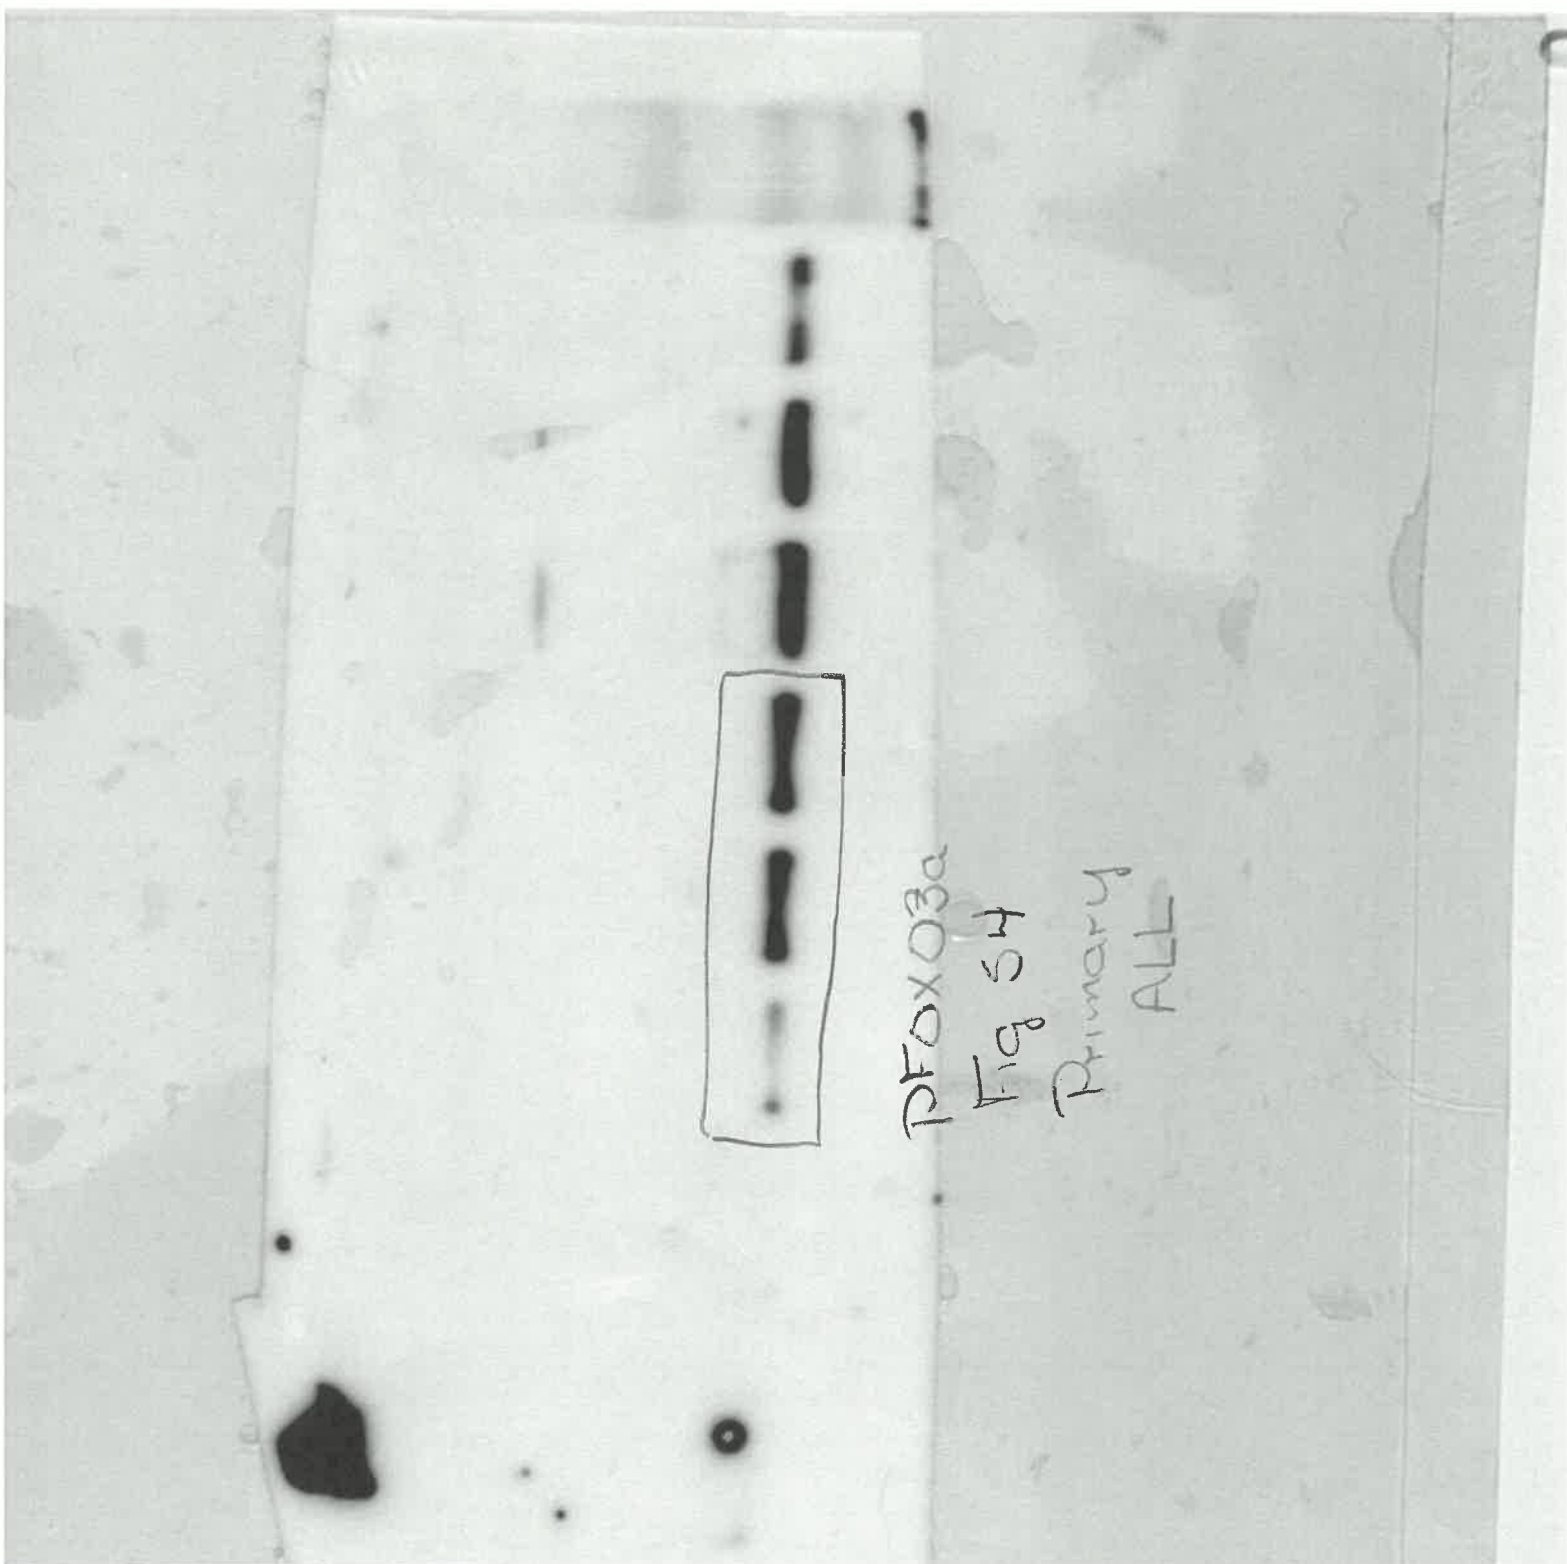

PFOX03a

Fig 54

Primary

ALL

F0x03a

Fig 54

Primary ALL

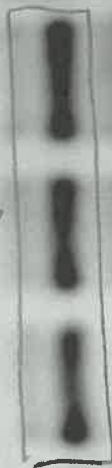

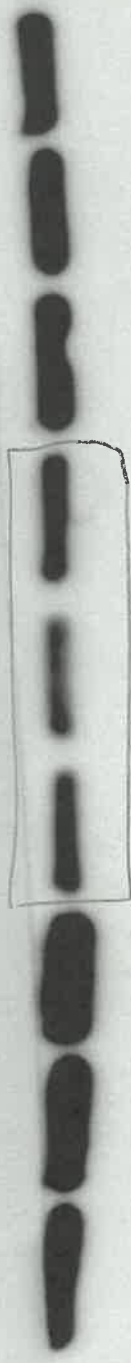

Boctn  
(pFOXO3a +  
FOXO3a)

Fig 54  
Primary  
ALL
